# Supplementary material
Source: publisher figshare collection journal article supplement (https://acs.figshare.com/ndownloader/files/4596427)
Supplement: Supplementary file 1 [file 4596427]

data_general

# SUBMISSION DETAILS

_publ_contact_author_name     'Paris Georghiou'
_publ_contact_author_address
;
Department of Chemistry
Department of Chemistry
Memorial University
St. John's, NL
A1B 3X7
;
_publ_contact_author_email    'parisg@mun.ca'
_publ_contact_author_phone    '(709) 737-8517 '
_publ_contact_author_fax      '(709) 737-3702'
_publ_requested_journal       'Journal of Organic Chemistry'
_publ_section_title
;
'C3v-Symmetrical Tribenzotriquinacenes as Hosts for C60 
and C70 in Solution and in the Solid State'
;
loop_
_publ_author_name
_publ_author_address
    'Paris Georghiou'
;
Department of Chemistry
Memorial University
St. John's, NL
A1B 3X7
;
    'Louise N. Dawe'
;
Centre for Chemical Analysis and Training
Faculty of Science
Memorial University
St. John's, NL, A1B 3X7
;
    'Huu-Anh Tran'
;
Department of Chemistry
Memorial University
St. John's, NL
A1B 3X7
;
    'J\=org Str\=ube'
;
Department of Chemistry
Bielefeld University
Universit\=atsstrasse 25, 
33651 Bielefeld, Germany
;
    'Beate Neumann'
;
Department of Chemistry
Bielefeld University
Universit\=atsstrasse 25, 
33651 Bielefeld, Germany
;
    'Hans-Georg Stammler'
;
Department of Chemistry
Bielefeld University
Universit\=atsstrasse 25, 
33651 Bielefeld, Germany
;
    'Dietmar Kuck'
;
Department of Chemistry
Bielefeld University
Universit\=atsstrasse 25, 
33651 Bielefeld, Germany
;

# start Validation Reply Form
_vrf_PUBL012_GLOBAL
;
PROBLEM: _publ_section_abstract is missing.
RESPONSE: Please refer to full paper.
;
_vrf_PLAT330_10C60_2.5chlorobenzene
;
PROBLEM: Large Average Phenyl C-C Dist.   C171   -C176          1.43 Ang. 
RESPONSE: C171   -C176 are part of two disordered solvent clorobenzene
molecules that were refined without restraints.
;
_vrf_PLAT761_10C60_2.5chlorobenzene
;
PROBLEM: CIF Contains no X-H Bonds ......................          ?
RESPONSE: Hydrogen atoms were refined on a riding model, therefore
no X-H bonds are reported.
;
_vrf_PLAT762_10C60_2.5chlorobenzene
;
PROBLEM: CIF Contains no X-Y-H or H-Y-H Angles ..........          ?
RESPONSE: Hydrogen atoms were refined on a riding model, therefore
no X-Y-H or H-Y-H angles are reported.
;
# end Validation Reply Form
 
data_10C60_2.5chlorobenzene
 
_audit_creation_method            SHELXL-97 
_chemical_name_systematic 
; 
 ? 
; 
_chemical_name_common             ? 
_chemical_melting_point           ? 
_chemical_formula_moiety          ? 
_chemical_formula_sum 
 'C179 H43 Cl2.50 S6' 
_chemical_formula_weight          2474.12 
 
loop_ 
 _atom_type_symbol 
 _atom_type_description 
 _atom_type_scat_dispersion_real 
 _atom_type_scat_dispersion_imag 
 _atom_type_scat_source 
 'C'  'C'   0.0033   0.0016 
 'International Tables Vol C Tables 4.2.6.8 and 6.1.1.4' 
 'H'  'H'   0.0000   0.0000 
 'International Tables Vol C Tables 4.2.6.8 and 6.1.1.4' 
 'Cl'  'Cl'   0.1484   0.1585 
 'International Tables Vol C Tables 4.2.6.8 and 6.1.1.4' 
 'S'  'S'   0.1246   0.1234 
 'International Tables Vol C Tables 4.2.6.8 and 6.1.1.4' 
 
_symmetry_cell_setting            monoclinic 
_symmetry_space_group_name_H-M    'P 21/n' 
 
loop_ 
 _symmetry_equiv_pos_as_xyz 
 'x, y, z' 
 '-x+1/2, y+1/2, -z+1/2' 
 '-x, -y, -z' 
 'x-1/2, -y-1/2, z-1/2' 
 
_cell_length_a                    21.171(4) 
_cell_length_b                    18.745(3) 
_cell_length_c                    25.119(4) 
_cell_angle_alpha                 90.00 
_cell_angle_beta                  91.987(4) 
_cell_angle_gamma                 90.00 
_cell_volume                      9963(3) 
_cell_formula_units_Z             4 
_cell_measurement_temperature     293(2) 
_cell_measurement_reflns_used     40014
_cell_measurement_theta_min       2.1519
_cell_measurement_theta_max       30.8584 
 
_exptl_crystal_description        'Platelet' 
_exptl_crystal_colour             'Red' 
_exptl_crystal_size_max           0.35 
_exptl_crystal_size_mid           0.35 
_exptl_crystal_size_min           0.02 
_exptl_crystal_density_meas       ? 
_exptl_crystal_density_diffrn     1.650 
_exptl_crystal_density_method     'not measured' 
_exptl_crystal_F_000              5022 
_exptl_absorpt_coefficient_mu     0.280 
_exptl_absorpt_correction_type    'Numerical' 
_exptl_absorpt_correction_T_min   0.9181 
_exptl_absorpt_correction_T_max   0.9937 
_exptl_absorpt_process_details    ? 
 
_exptl_special_details 
; 
 ? 
; 
 
_diffrn_ambient_temperature       293(2) 
_diffrn_radiation_wavelength      0.71070 
_diffrn_radiation_type            MoK\a 
_diffrn_radiation_source          'fine-focus sealed tube' 
_diffrn_radiation_monochromator   graphite 
_diffrn_measurement_device_type   'Rigaku Saturn'
_diffrn_measurement_method        \w
_diffrn_detector_area_resol_mean  14.63 
_diffrn_reflns_number             42985 
_diffrn_reflns_av_R_equivalents   0.0618 
_diffrn_reflns_av_sigmaI/netI     0.0963 
_diffrn_reflns_limit_h_min        -19 
_diffrn_reflns_limit_h_max        26 
_diffrn_reflns_limit_k_min        -18 
_diffrn_reflns_limit_k_max        23 
_diffrn_reflns_limit_l_min        -31 
_diffrn_reflns_limit_l_max        31 
_diffrn_reflns_theta_min          2.15 
_diffrn_reflns_theta_max          26.50 
_reflns_number_total              20556 
_reflns_number_gt                 15061 
_reflns_threshold_expression      >2sigma(I) 
 
_computing_data_collection        'CrystalClear (Rigaku/MSC Inc., 2005)'
_computing_cell_refinement        'CrystalClear (Rigaku/MSC Inc., 2005)'
_computing_data_reduction         'CrystalClear (Rigaku/MSC Inc., 2005)'
_computing_structure_solution     'SHELXS-97 (Sheldrick, 1990)' 
_computing_structure_refinement   'SHELXL-97 (Sheldrick, 1997)' 
_computing_molecular_graphics    'CrystalStructure3.7.0(Rigaku/MSC Inc.,2005)' 
_computing_publication_material  'CrystalStructure3.7.0(Rigaku/MSC Inc.,2005)'
 
_refine_special_details 
; 
 Refinement of F^2^ against ALL reflections.  The weighted R-factor wR and 
 goodness of fit S are based on F^2^, conventional R-factors R are based 
 on F, with F set to zero for negative F^2^. The threshold expression of 
 F^2^ > 2sigma(F^2^) is used only for calculating R-factors(gt) etc. and is 
 not relevant to the choice of reflections for refinement.  R-factors based 
 on F^2^ are statistically about twice as large as those based on F, and R- 
 factors based on ALL data will be even larger. 
; 
 
_refine_ls_structure_factor_coef  Fsqd  
_refine_ls_matrix_type            full 
_refine_ls_weighting_scheme       calc  
_refine_ls_weighting_details 
 'calc w=1/[\s^2^(Fo^2^)+(0.0649P)^2^+34.7439P] where P=(Fo^2^+2Fc^2^)/3' 
_atom_sites_solution_primary      direct 
_atom_sites_solution_secondary    difmap 
_atom_sites_solution_hydrogens    geom 
_refine_ls_hydrogen_treatment     constr 
_refine_ls_extinction_method      none 
_refine_ls_extinction_coef        ? 
_refine_ls_number_reflns          20556 
_refine_ls_number_parameters      1703 
_refine_ls_number_restraints      0 
_refine_ls_R_factor_all           0.1556 
_refine_ls_R_factor_gt            0.1218 
_refine_ls_wR_factor_ref          0.2606 
_refine_ls_wR_factor_gt           0.2388 
_refine_ls_goodness_of_fit_ref    1.153 
_refine_ls_restrained_S_all       1.153 
_refine_ls_shift/su_max           0.001 
_refine_ls_shift/su_mean          0.000 
 
loop_ 
 _atom_site_label 
 _atom_site_type_symbol 
 _atom_site_fract_x 
 _atom_site_fract_y 
 _atom_site_fract_z 
 _atom_site_U_iso_or_equiv 
 _atom_site_adp_type 
 _atom_site_occupancy 
 _atom_site_symmetry_multiplicity 
 _atom_site_calc_flag 
 _atom_site_refinement_flags 
 _atom_site_disorder_assembly 
 _atom_site_disorder_group 
Cl1 Cl 0.89181(8) 0.10399(9) 0.54502(7) 0.0531(4) Uani 1 1 d . . . 
Cl2 Cl 0.29291(15) 0.09640(17) 0.48482(12) 0.1084(9) Uani 1 1 d . . . 
Cl3 Cl 0.4558(3) 0.01549(19) 0.41187(17) 0.1091(15) Uani 0.68 1 d P . . 
S1 S 0.72518(7) 0.03360(8) 0.40240(6) 0.0335(3) Uani 1 1 d . . . 
S2 S 0.83627(7) 0.13860(8) 0.36501(6) 0.0341(3) Uani 1 1 d . . . 
S3 S 0.78445(7) 0.51645(8) 0.40984(6) 0.0355(3) Uani 1 1 d . . . 
S4 S 0.67331(7) 0.57815(8) 0.48556(6) 0.0347(3) Uani 1 1 d . . . 
S5 S 0.44915(7) 0.33332(8) 0.57994(6) 0.0337(3) Uani 1 1 d . . . 
S6 S 0.46100(7) 0.16976(8) 0.54420(6) 0.0335(3) Uani 1 1 d . . . 
C1 C 0.6611(3) 0.2890(3) 0.8673(3) 0.0409(15) Uani 1 1 d . . . 
C2 C 0.6768(3) 0.2408(4) 0.9107(2) 0.0423(15) Uani 1 1 d . . . 
C3 C 0.6318(3) 0.2251(4) 0.9473(2) 0.0464(16) Uani 1 1 d . . . 
C4 C 0.6248(3) 0.1521(4) 0.9661(2) 0.0449(16) Uani 1 1 d . . . 
C5 C 0.5577(3) 0.1394(4) 0.9732(2) 0.0434(15) Uani 1 1 d . . . 
C6 C 0.5326(3) 0.0730(4) 0.9616(2) 0.0425(15) Uani 1 1 d . . . 
C7 C 0.5732(3) 0.0167(4) 0.9411(3) 0.0447(16) Uani 1 1 d . . . 
C8 C 0.5372(3) -0.0232(3) 0.9011(3) 0.0434(15) Uani 1 1 d . . . 
C9 C 0.5661(3) -0.0475(3) 0.8561(3) 0.0445(15) Uani 1 1 d . . . 
C10 C 0.5341(3) -0.0412(3) 0.8044(3) 0.0470(16) Uani 1 1 d . . . 
C11 C 0.5804(3) -0.0250(3) 0.7652(3) 0.0460(16) Uani 1 1 d . . . 
C12 C 0.5660(3) 0.0200(4) 0.7237(3) 0.0449(16) Uani 1 1 d . . . 
C13 C 0.6118(3) 0.0733(4) 0.7079(2) 0.0453(16) Uani 1 1 d . . . 
C14 C 0.5770(3) 0.1369(4) 0.6929(2) 0.0432(15) Uani 1 1 d . . . 
C15 C 0.6017(3) 0.2036(4) 0.7058(2) 0.0401(15) Uani 1 1 d . . . 
C16 C 0.6623(3) 0.2088(3) 0.7337(2) 0.0395(14) Uani 1 1 d . . . 
C17 C 0.6600(3) 0.2684(3) 0.7706(3) 0.0444(15) Uani 1 1 d . . . 
C18 C 0.6915(3) 0.2627(4) 0.8202(2) 0.0415(15) Uani 1 1 d . . . 
C19 C 0.7165(3) 0.1851(4) 0.8913(2) 0.0406(15) Uani 1 1 d . . . 
C20 C 0.7097(3) 0.1153(4) 0.9088(3) 0.0427(15) Uani 1 1 d . . . 
C21 C 0.6630(3) 0.0993(4) 0.9475(2) 0.0427(15) Uani 1 1 d . . . 
C22 C 0.6360(3) 0.0297(4) 0.9345(3) 0.0477(17) Uani 1 1 d . . . 
C23 C 0.6664(3) 0.0043(3) 0.8875(3) 0.0421(15) Uani 1 1 d . . . 
C24 C 0.6329(3) -0.0345(3) 0.8490(3) 0.0434(15) Uani 1 1 d . . . 
C25 C 0.6425(3) -0.0204(3) 0.7938(3) 0.0429(15) Uani 1 1 d . . . 
C26 C 0.6854(3) 0.0305(4) 0.7785(3) 0.0453(16) Uani 1 1 d . . . 
C27 C 0.6694(3) 0.0778(4) 0.7340(2) 0.0422(15) Uani 1 1 d . . . 
C28 C 0.6957(3) 0.1473(4) 0.7480(2) 0.0392(14) Uani 1 1 d . . . 
C29 C 0.7277(3) 0.1423(4) 0.7994(2) 0.0405(14) Uani 1 1 d . . . 
C30 C 0.7254(3) 0.1982(4) 0.8349(3) 0.0427(15) Uani 1 1 d . . . 
C31 C 0.7125(3) 0.0567(4) 0.8715(3) 0.0419(15) Uani 1 1 d . . . 
C32 C 0.7212(3) 0.0696(4) 0.8187(2) 0.0418(15) Uani 1 1 d . . . 
C33 C 0.6012(3) 0.3190(3) 0.8621(3) 0.0442(15) Uani 1 1 d . . . 
C34 C 0.5547(3) 0.3026(3) 0.9008(3) 0.0441(16) Uani 1 1 d . . . 
C35 C 0.5695(3) 0.2567(4) 0.9426(3) 0.0464(16) Uani 1 1 d . . . 
C36 C 0.5236(3) 0.2029(4) 0.9589(2) 0.0459(16) Uani 1 1 d . . . 
C37 C 0.4713(3) 0.0672(4) 0.9334(2) 0.0425(15) Uani 1 1 d . . . 
C38 C 0.4740(3) 0.0080(4) 0.8964(3) 0.0435(15) Uani 1 1 d . . . 
C39 C 0.4441(3) 0.0138(4) 0.8470(3) 0.0453(16) Uani 1 1 d . . . 
C40 C 0.4740(3) -0.0114(3) 0.7989(3) 0.0429(15) Uani 1 1 d . . . 
C41 C 0.4584(3) 0.0358(3) 0.7557(3) 0.0424(15) Uani 1 1 d . . . 
C42 C 0.5036(3) 0.0512(3) 0.7185(2) 0.0403(15) Uani 1 1 d . . . 
C43 C 0.5096(3) 0.1246(4) 0.6995(2) 0.0467(17) Uani 1 1 d . . . 
C44 C 0.5616(3) 0.2601(4) 0.7254(2) 0.0451(16) Uani 1 1 d . . . 
C45 C 0.5983(3) 0.2998(3) 0.7659(3) 0.0435(15) Uani 1 1 d . . . 
C46 C 0.5686(3) 0.3242(3) 0.8104(3) 0.0446(16) Uani 1 1 d . . . 
C47 C 0.4938(3) 0.2976(3) 0.8731(3) 0.0462(16) Uani 1 1 d . . . 
C48 C 0.4509(3) 0.2465(4) 0.8879(3) 0.0425(15) Uani 1 1 d . . . 
C49 C 0.4656(3) 0.1976(4) 0.9316(2) 0.0447(16) Uani 1 1 d . . . 
C50 C 0.4391(3) 0.1289(4) 0.9189(2) 0.0429(15) Uani 1 1 d . . . 
C51 C 0.4074(3) 0.1348(4) 0.8669(3) 0.0453(16) Uani 1 1 d . . . 
C52 C 0.4093(3) 0.0782(4) 0.8321(3) 0.0442(16) Uani 1 1 d . . . 
C53 C 0.4185(3) 0.0921(4) 0.7751(3) 0.0427(15) Uani 1 1 d . . . 
C54 C 0.4253(3) 0.1612(4) 0.7576(3) 0.0452(16) Uani 1 1 d . . . 
C55 C 0.4717(3) 0.1774(3) 0.7186(2) 0.0416(15) Uani 1 1 d . . . 
C56 C 0.4983(3) 0.2481(4) 0.7314(3) 0.0479(17) Uani 1 1 d . . . 
C57 C 0.4680(3) 0.2740(3) 0.7784(3) 0.0435(15) Uani 1 1 d . . . 
C58 C 0.5027(3) 0.3113(3) 0.8172(3) 0.0445(15) Uani 1 1 d . . . 
C59 C 0.4139(3) 0.2072(4) 0.8476(3) 0.0434(15) Uani 1 1 d . . . 
C60 C 0.4226(3) 0.2201(4) 0.7938(3) 0.0421(15) Uani 1 1 d . . . 
C61 C 0.5064(4) 0.5092(4) 0.3652(4) 0.072(3) Uani 1 1 d . . . 
C62 C 0.5468(4) 0.4777(5) 0.4042(3) 0.066(2) Uani 1 1 d . . . 
C63 C 0.5215(4) 0.4211(6) 0.4356(3) 0.071(3) Uani 1 1 d . . . 
C64 C 0.5601(5) 0.3621(7) 0.4482(3) 0.088(3) Uani 1 1 d . . . 
C65 C 0.5214(5) 0.2957(6) 0.4445(3) 0.077(3) Uani 1 1 d . . . 
C66 C 0.5469(5) 0.2345(7) 0.4247(4) 0.087(3) Uani 1 1 d . . . 
C67 C 0.6124(5) 0.2329(7) 0.4060(4) 0.099(4) Uani 1 1 d . . . 
C68 C 0.6133(5) 0.1892(5) 0.3586(4) 0.073(3) Uani 1 1 d . . . 
C69 C 0.6494(3) 0.2055(4) 0.3153(3) 0.058(2) Uani 1 1 d . . . 
C70 C 0.6239(4) 0.1974(4) 0.2628(4) 0.064(2) Uani 1 1 d . . . 
C71 C 0.6463(5) 0.2570(7) 0.2307(4) 0.093(4) Uani 1 1 d . . . 
C72 C 0.6115(6) 0.2869(7) 0.1947(4) 0.104(4) Uani 1 1 d . . . 
C73 C 0.6117(5) 0.3659(5) 0.1894(3) 0.070(2) Uani 1 1 d . . . 
C74 C 0.5476(6) 0.3845(7) 0.1747(3) 0.086(3) Uani 1 1 d . . . 
C75 C 0.5225(5) 0.4454(8) 0.1939(5) 0.102(4) Uani 1 1 d . . . 
C76 C 0.5598(6) 0.4914(5) 0.2290(5) 0.085(3) Uani 1 1 d . . . 
C77 C 0.5194(6) 0.5198(5) 0.2704(6) 0.101(4) Uani 1 1 d . . . 
C78 C 0.5426(6) 0.5273(4) 0.3186(5) 0.086(3) Uani 1 1 d . . . 
C79 C 0.6097(3) 0.4734(4) 0.3872(3) 0.0501(17) Uani 1 1 d . . . 
C80 C 0.6458(3) 0.4133(4) 0.4012(3) 0.0489(17) Uani 1 1 d . . . 
C81 C 0.6201(4) 0.3591(5) 0.4315(3) 0.067(2) Uani 1 1 d . . . 
C82 C 0.6478(4) 0.2874(6) 0.4079(4) 0.082(3) Uani 1 1 d . . . 
C83 C 0.6873(3) 0.3095(4) 0.3641(3) 0.0549(19) Uani 1 1 d . . . 
C84 C 0.6885(3) 0.2698(5) 0.3188(4) 0.064(2) Uani 1 1 d . . . 
C85 C 0.6877(4) 0.3043(6) 0.2680(4) 0.070(2) Uani 1 1 d . . . 
C86 C 0.6868(4) 0.3756(7) 0.2636(3) 0.078(3) Uani 1 1 d . . . 
C87 C 0.6468(4) 0.4084(6) 0.2219(3) 0.072(3) Uani 1 1 d . . . 
C88 C 0.6204(5) 0.4718(6) 0.2416(3) 0.075(3) Uani 1 1 d . . . 
C89 C 0.6446(6) 0.4789(6) 0.2984(5) 0.103(4) Uani 1 1 d . . . 
C90 C 0.6131(5) 0.5022(5) 0.3362(4) 0.086(3) Uani 1 1 d . . . 
C91 C 0.6855(3) 0.3851(4) 0.3616(3) 0.0551(19) Uani 1 1 d . . . 
C92 C 0.6859(3) 0.4175(5) 0.3115(4) 0.061(2) Uani 1 1 d . . . 
C93 C 0.4445(4) 0.4841(4) 0.3563(4) 0.065(2) Uani 1 1 d . . . 
C94 C 0.4223(5) 0.4237(7) 0.3890(4) 0.100(4) Uani 1 1 d . . . 
C95 C 0.4582(5) 0.3941(6) 0.4257(4) 0.088(3) Uani 1 1 d . . . 
C96 C 0.4574(5) 0.3149(5) 0.4304(3) 0.066(2) Uani 1 1 d . . . 
C97 C 0.5093(6) 0.1907(5) 0.3905(4) 0.083(3) Uani 1 1 d . . . 
C98 C 0.5507(5) 0.1623(5) 0.3498(5) 0.089(3) Uani 1 1 d . . . 
C99 C 0.5272(5) 0.1545(4) 0.3002(5) 0.076(3) Uani 1 1 d . . . 
C100 C 0.5626(4) 0.1718(4) 0.2548(4) 0.069(2) Uani 1 1 d . . . 
C101 C 0.5222(5) 0.2032(5) 0.2147(4) 0.074(3) Uani 1 1 d . . . 
C102 C 0.5465(5) 0.2599(7) 0.1838(3) 0.083(3) Uani 1 1 d . . . 
C103 C 0.5079(6) 0.3189(7) 0.1711(3) 0.090(3) Uani 1 1 d . . . 
C104 C 0.4563(6) 0.4499(7) 0.2140(5) 0.108(4) Uani 1 1 d . . . 
C105 C 0.4564(6) 0.4945(5) 0.2601(4) 0.082(3) Uani 1 1 d . . . 
C106 C 0.4185(4) 0.4760(4) 0.3040(4) 0.066(2) Uani 1 1 d . . . 
C107 C 0.3809(3) 0.3776(5) 0.3510(4) 0.066(2) Uani 1 1 d . . . 
C108 C 0.3823(4) 0.3055(6) 0.3559(4) 0.078(3) Uani 1 1 d . . . 
C109 C 0.4226(4) 0.2732(6) 0.3973(3) 0.068(2) Uani 1 1 d . . . 
C110 C 0.4494(5) 0.2091(5) 0.3763(4) 0.069(2) Uani 1 1 d . . . 
C111 C 0.4234(5) 0.2025(6) 0.3195(5) 0.097(4) Uani 1 1 d . . . 
C112 C 0.4569(6) 0.1783(5) 0.2835(5) 0.090(3) Uani 1 1 d . . . 
C113 C 0.4587(4) 0.2076(4) 0.2310(3) 0.059(2) Uani 1 1 d . . . 
C114 C 0.4222(4) 0.2673(5) 0.2184(3) 0.061(2) Uani 1 1 d . . . 
C115 C 0.4481(4) 0.3208(5) 0.1875(3) 0.069(2) Uani 1 1 d . . . 
C116 C 0.4223(5) 0.3946(6) 0.2104(4) 0.093(4) Uani 1 1 d . . . 
C117 C 0.3803(3) 0.3718(5) 0.2545(4) 0.063(2) Uani 1 1 d . . . 
C118 C 0.3796(3) 0.4115(5) 0.3000(4) 0.067(2) Uani 1 1 d . . . 
C119 C 0.3823(3) 0.2632(5) 0.3078(4) 0.062(2) Uani 1 1 d . . . 
C120 C 0.3823(3) 0.2956(4) 0.2577(3) 0.057(2) Uani 1 1 d . . . 
C121 C 0.7908(3) 0.2594(3) 0.6376(2) 0.0336(13) Uani 1 1 d . . . 
H1 H 0.8246 0.2274 0.6299 0.040 Uiso 1 1 calc R . . 
H2 H 0.7654 0.2389 0.6647 0.040 Uiso 1 1 calc R . . 
H3 H 0.8080 0.3040 0.6501 0.040 Uiso 1 1 calc R . . 
C122 C 0.7498(3) 0.2720(3) 0.5871(2) 0.0292(12) Uani 1 1 d . . . 
C123 C 0.7096(3) 0.2032(3) 0.5702(2) 0.0289(12) Uani 1 1 d . . . 
C124 C 0.7186(3) 0.1381(3) 0.6054(2) 0.0341(13) Uani 1 1 d . . . 
H4 H 0.7629 0.1277 0.6098 0.041 Uiso 1 1 calc R . . 
H5 H 0.6972 0.0981 0.5892 0.041 Uiso 1 1 calc R . . 
H6 H 0.7014 0.1474 0.6396 0.041 Uiso 1 1 calc R . . 
C125 C 0.7315(2) 0.1854(3) 0.5150(2) 0.0300(12) Uani 1 1 d . . . 
C126 C 0.7137(3) 0.1278(3) 0.4839(2) 0.0306(12) Uani 1 1 d . . . 
H7 H 0.6813 0.0981 0.4946 0.037 Uiso 1 1 calc R . . 
C127 C 0.7432(3) 0.1138(3) 0.4372(2) 0.0323(12) Uani 1 1 d . . . 
C128 C 0.7316(3) 0.0580(3) 0.3348(2) 0.0306(12) Uani 1 1 d . . . 
C129 C 0.6908(3) 0.0291(3) 0.2969(2) 0.0373(14) Uani 1 1 d . . . 
H8 H 0.6580 -0.0004 0.3070 0.045 Uiso 1 1 calc R . . 
C130 C 0.6989(3) 0.0441(3) 0.2433(2) 0.0367(14) Uani 1 1 d . . . 
H9 H 0.6728 0.0222 0.2176 0.044 Uiso 1 1 calc R . . 
C131 C 0.7448(3) 0.0908(3) 0.2278(2) 0.0354(13) Uani 1 1 d . . . 
H10 H 0.7489 0.1016 0.1920 0.042 Uiso 1 1 calc R . . 
C132 C 0.7852(3) 0.1217(3) 0.2662(2) 0.0309(12) Uani 1 1 d . . . 
H11 H 0.8160 0.1539 0.2561 0.037 Uiso 1 1 calc R . . 
C133 C 0.7794(3) 0.1045(3) 0.3195(2) 0.0314(12) Uani 1 1 d . . . 
C134 C 0.7907(3) 0.1596(3) 0.4203(2) 0.0292(12) Uani 1 1 d . . . 
C135 C 0.8057(3) 0.2203(3) 0.4499(2) 0.0295(12) Uani 1 1 d . . . 
H12 H 0.8349 0.2529 0.4375 0.035 Uiso 1 1 calc R . . 
C136 C 0.7772(2) 0.2323(3) 0.4977(2) 0.0296(12) Uani 1 1 d . . . 
C137 C 0.7915(3) 0.2916(3) 0.5377(2) 0.0305(12) Uani 1 1 d . . . 
C138 C 0.8632(2) 0.2997(3) 0.5489(2) 0.0312(12) Uani 1 1 d . . . 
H13 H 0.8819 0.2533 0.5539 0.037 Uiso 1 1 calc R . . 
H14 H 0.8705 0.3277 0.5806 0.037 Uiso 1 1 calc R . . 
H15 H 0.8820 0.3230 0.5193 0.037 Uiso 1 1 calc R . . 
C139 C 0.7652(2) 0.3635(3) 0.5190(2) 0.0287(12) Uani 1 1 d . . . 
C140 C 0.7871(2) 0.4046(3) 0.4782(2) 0.0298(12) Uani 1 1 d . . . 
H16 H 0.8202 0.3880 0.4582 0.036 Uiso 1 1 calc R . . 
C141 C 0.7599(3) 0.4713(3) 0.4667(2) 0.0309(12) Uani 1 1 d . . . 
C142 C 0.7805(3) 0.6070(3) 0.4286(2) 0.0350(13) Uani 1 1 d . . . 
C143 C 0.8247(3) 0.6530(3) 0.4080(2) 0.0399(14) Uani 1 1 d . . . 
H17 H 0.8566 0.6354 0.3871 0.048 Uiso 1 1 calc R . . 
C144 C 0.8211(3) 0.7251(4) 0.4187(2) 0.0441(15) Uani 1 1 d . . . 
H18 H 0.8502 0.7565 0.4046 0.053 Uiso 1 1 calc R . . 
C145 C 0.7739(3) 0.7503(3) 0.4506(2) 0.0454(16) Uani 1 1 d . . . 
H19 H 0.7716 0.7989 0.4578 0.054 Uiso 1 1 calc R . . 
C146 C 0.7305(3) 0.7051(3) 0.4717(2) 0.0381(14) Uani 1 1 d . . . 
H20 H 0.6993 0.7227 0.4933 0.046 Uiso 1 1 calc R . . 
C147 C 0.7337(3) 0.6324(3) 0.4604(2) 0.0344(13) Uani 1 1 d . . . 
C148 C 0.7120(3) 0.4959(3) 0.4991(2) 0.0304(12) Uani 1 1 d . . . 
C149 C 0.6913(3) 0.4551(3) 0.5409(2) 0.0313(12) Uani 1 1 d . . . 
H21 H 0.6605 0.4728 0.5629 0.038 Uiso 1 1 calc R . . 
C150 C 0.7169(2) 0.3872(3) 0.5503(2) 0.0282(12) Uani 1 1 d . . . 
C151 C 0.7007(3) 0.3361(3) 0.5940(2) 0.0305(12) Uani 1 1 d . . . 
C152 C 0.7028(3) 0.3737(3) 0.6483(2) 0.0336(13) Uani 1 1 d . . . 
H22 H 0.7416 0.4000 0.6526 0.040 Uiso 1 1 calc R . . 
H23 H 0.7005 0.3388 0.6762 0.040 Uiso 1 1 calc R . . 
H24 H 0.6677 0.4059 0.6502 0.040 Uiso 1 1 calc R . . 
C153 C 0.6369(3) 0.3007(3) 0.5838(2) 0.0296(12) Uani 1 1 d . . . 
C154 C 0.5779(3) 0.3313(3) 0.5885(2) 0.0297(12) Uani 1 1 d . . . 
H25 H 0.5746 0.3788 0.5989 0.036 Uiso 1 1 calc R . . 
C155 C 0.5236(2) 0.2916(3) 0.5779(2) 0.0288(12) Uani 1 1 d . . . 
C156 C 0.4024(3) 0.2662(3) 0.6090(2) 0.0313(12) Uani 1 1 d . . . 
C157 C 0.3582(3) 0.2860(3) 0.6457(2) 0.0346(13) Uani 1 1 d . . . 
H26 H 0.3561 0.3331 0.6572 0.042 Uiso 1 1 calc R . . 
C158 C 0.3175(3) 0.2356(3) 0.6650(2) 0.0389(14) Uani 1 1 d . . . 
H27 H 0.2877 0.2489 0.6895 0.047 Uiso 1 1 calc R . . 
C159 C 0.3207(3) 0.1647(3) 0.6480(2) 0.0369(14) Uani 1 1 d . . . 
H28 H 0.2926 0.1310 0.6605 0.044 Uiso 1 1 calc R . . 
C160 C 0.3662(3) 0.1451(3) 0.6124(2) 0.0340(13) Uani 1 1 d . . . 
H29 H 0.3696 0.0977 0.6019 0.041 Uiso 1 1 calc R . . 
C161 C 0.4069(3) 0.1960(3) 0.5920(2) 0.0303(12) Uani 1 1 d . . . 
C162 C 0.5285(3) 0.2201(3) 0.5632(2) 0.0299(12) Uani 1 1 d . . . 
C163 C 0.5874(3) 0.1884(3) 0.5606(2) 0.0294(12) Uani 1 1 d . . . 
H30 H 0.5907 0.1402 0.5526 0.035 Uiso 1 1 calc R . . 
C164 C 0.6418(3) 0.2293(3) 0.5700(2) 0.0285(12) Uani 1 1 d . . . 
C165 C 0.9701(3) 0.0759(3) 0.5519(2) 0.0385(14) Uani 1 1 d . . . 
C166 C 0.9830(3) 0.0064(3) 0.5678(2) 0.0421(15) Uani 1 1 d . . . 
H31 H 0.9503 -0.0249 0.5749 0.050 Uiso 1 1 calc R . . 
C167 C 1.0449(3) -0.0154(4) 0.5728(2) 0.0489(17) Uani 1 1 d . . . 
H32 H 1.0542 -0.0614 0.5845 0.059 Uiso 1 1 calc R . . 
C168 C 1.0932(3) 0.0301(4) 0.5607(3) 0.0526(18) Uani 1 1 d . . . 
H33 H 1.1349 0.0147 0.5634 0.063 Uiso 1 1 calc R . . 
C169 C 1.0793(3) 0.0993(4) 0.5445(3) 0.0497(17) Uani 1 1 d . . . 
H34 H 1.1120 0.1302 0.5367 0.060 Uiso 1 1 calc R . . 
C170 C 1.0175(3) 0.1228(4) 0.5398(2) 0.0467(16) Uani 1 1 d . . . 
H35 H 1.0082 0.1691 0.5288 0.056 Uiso 1 1 calc R . . 
C171 C 0.2653(6) 0.0786(6) 0.4219(4) 0.098(4) Uani 1 1 d . . . 
C172 C 0.2090(4) 0.0384(4) 0.4134(5) 0.080(3) Uani 1 1 d . . . 
H36 H 0.1850 0.0206 0.4408 0.096 Uiso 1 1 calc R . . 
C173 C 0.1934(6) 0.0286(6) 0.3579(7) 0.151(7) Uani 1 1 d . . . 
H37 H 0.1568 0.0013 0.3546 0.181 Uiso 1 1 calc R . . 
C174 C 0.2143(3) 0.0459(3) 0.3047(4) 0.052(2) Uani 1 1 d . . . 
H38 H 0.1982 0.0377 0.2704 0.063 Uiso 1 1 calc R . . 
C175 C 0.2734(7) 0.0832(6) 0.3280(5) 0.116(5) Uani 1 1 d . . . 
H39 H 0.3000 0.0979 0.3015 0.139 Uiso 1 1 calc R . . 
C176 C 0.2973(4) 0.1006(4) 0.3776(4) 0.065(2) Uani 1 1 d . . . 
H40 H 0.3345 0.1267 0.3815 0.078 Uiso 1 1 calc R . . 
C177 C 0.5534(4) 0.0110(4) 0.4852(4) 0.058(2) Uani 1 1 d . . . 
C178 C 0.4844(8) 0.0056(6) 0.4735(5) 0.048(3) Uani 0.50 1 d P . . 
C179 C 0.5371(9) 0.0210(7) 0.4358(6) 0.062(5) Uani 0.50 1 d P . . 
C180 C 0.4290(8) -0.0009(7) 0.4645(8) 0.066(5) Uani 0.50 1 d P . . 
 
loop_ 
 _atom_site_aniso_label 
 _atom_site_aniso_U_11 
 _atom_site_aniso_U_22 
 _atom_site_aniso_U_33 
 _atom_site_aniso_U_23 
 _atom_site_aniso_U_13 
 _atom_site_aniso_U_12 
Cl1 0.0513(10) 0.0476(10) 0.0601(11) -0.0013(8) -0.0043(8) 0.0111(8) 
Cl2 0.109(2) 0.115(2) 0.099(2) -0.0121(17) -0.0193(17) 0.0241(18) 
Cl3 0.187(5) 0.0510(19) 0.087(3) -0.0045(18) -0.018(3) -0.007(2) 
S1 0.0388(8) 0.0317(7) 0.0297(7) -0.0025(6) -0.0035(6) -0.0038(6) 
S2 0.0306(7) 0.0412(8) 0.0303(7) -0.0060(6) -0.0026(6) -0.0037(6) 
S3 0.0418(8) 0.0367(8) 0.0277(7) 0.0017(6) -0.0008(6) -0.0006(7) 
S4 0.0334(8) 0.0343(8) 0.0359(8) 0.0020(6) -0.0050(6) 0.0033(6) 
S5 0.0278(7) 0.0322(7) 0.0408(8) 0.0006(6) -0.0040(6) 0.0015(6) 
S6 0.0318(7) 0.0356(8) 0.0330(7) -0.0060(6) -0.0014(6) -0.0032(6) 
C1 0.041(3) 0.039(3) 0.042(4) -0.009(3) -0.006(3) -0.011(3) 
C2 0.039(3) 0.053(4) 0.034(3) -0.008(3) -0.004(3) -0.008(3) 
C3 0.048(4) 0.057(4) 0.034(3) -0.013(3) -0.008(3) 0.001(3) 
C4 0.042(4) 0.067(5) 0.025(3) 0.006(3) -0.013(3) -0.003(3) 
C5 0.047(4) 0.056(4) 0.027(3) 0.003(3) 0.003(3) -0.001(3) 
C6 0.050(4) 0.054(4) 0.023(3) 0.011(3) 0.003(3) 0.003(3) 
C7 0.043(4) 0.051(4) 0.040(4) 0.019(3) -0.005(3) -0.002(3) 
C8 0.041(3) 0.040(4) 0.048(4) 0.016(3) -0.003(3) -0.002(3) 
C9 0.050(4) 0.033(3) 0.050(4) 0.005(3) -0.002(3) 0.004(3) 
C10 0.044(4) 0.035(3) 0.062(4) -0.006(3) -0.001(3) -0.003(3) 
C11 0.049(4) 0.031(3) 0.058(4) -0.011(3) -0.002(3) -0.002(3) 
C12 0.050(4) 0.045(4) 0.039(3) -0.018(3) -0.002(3) 0.001(3) 
C13 0.052(4) 0.053(4) 0.031(3) -0.010(3) 0.001(3) -0.004(3) 
C14 0.048(4) 0.059(4) 0.023(3) 0.000(3) -0.004(3) -0.007(3) 
C15 0.044(4) 0.051(4) 0.025(3) 0.011(3) 0.002(3) 0.000(3) 
C16 0.038(3) 0.045(4) 0.035(3) 0.009(3) 0.001(3) -0.009(3) 
C17 0.043(4) 0.038(3) 0.053(4) 0.005(3) 0.004(3) -0.011(3) 
C18 0.041(3) 0.048(4) 0.036(3) 0.003(3) 0.006(3) -0.012(3) 
C19 0.028(3) 0.057(4) 0.037(3) -0.006(3) -0.008(2) -0.006(3) 
C20 0.034(3) 0.050(4) 0.043(4) 0.003(3) -0.015(3) 0.000(3) 
C21 0.037(3) 0.062(4) 0.028(3) 0.008(3) -0.007(3) 0.001(3) 
C22 0.046(4) 0.053(4) 0.043(4) 0.016(3) -0.011(3) 0.009(3) 
C23 0.039(3) 0.046(4) 0.040(3) 0.009(3) -0.006(3) 0.011(3) 
C24 0.046(4) 0.031(3) 0.053(4) 0.003(3) 0.002(3) 0.012(3) 
C25 0.041(3) 0.044(4) 0.043(4) -0.008(3) 0.000(3) 0.015(3) 
C26 0.043(4) 0.050(4) 0.043(4) -0.006(3) 0.003(3) 0.018(3) 
C27 0.042(4) 0.048(4) 0.038(3) -0.005(3) 0.010(3) 0.001(3) 
C28 0.033(3) 0.062(4) 0.023(3) 0.000(3) 0.006(2) 0.003(3) 
C29 0.031(3) 0.053(4) 0.037(3) -0.006(3) -0.002(3) 0.001(3) 
C30 0.026(3) 0.054(4) 0.048(4) -0.001(3) -0.001(3) -0.007(3) 
C31 0.028(3) 0.054(4) 0.043(4) 0.003(3) -0.010(3) 0.008(3) 
C32 0.031(3) 0.056(4) 0.039(3) 0.002(3) 0.001(3) 0.008(3) 
C33 0.046(4) 0.041(4) 0.045(4) -0.008(3) -0.001(3) -0.006(3) 
C34 0.061(4) 0.034(3) 0.037(3) -0.016(3) 0.001(3) 0.004(3) 
C35 0.049(4) 0.051(4) 0.039(4) -0.017(3) 0.002(3) 0.000(3) 
C36 0.048(4) 0.059(4) 0.031(3) -0.012(3) 0.003(3) 0.004(3) 
C37 0.037(3) 0.055(4) 0.037(3) 0.010(3) 0.009(3) -0.006(3) 
C38 0.038(3) 0.045(4) 0.047(4) 0.010(3) 0.002(3) -0.013(3) 
C39 0.039(3) 0.046(4) 0.051(4) 0.004(3) -0.003(3) -0.014(3) 
C40 0.042(4) 0.039(3) 0.047(4) -0.005(3) -0.003(3) -0.017(3) 
C41 0.036(3) 0.044(4) 0.046(4) -0.008(3) -0.012(3) -0.014(3) 
C42 0.045(4) 0.047(4) 0.029(3) -0.010(3) -0.006(3) -0.006(3) 
C43 0.054(4) 0.064(4) 0.020(3) -0.006(3) -0.014(3) -0.008(4) 
C44 0.043(4) 0.056(4) 0.035(3) 0.022(3) -0.009(3) 0.001(3) 
C45 0.053(4) 0.038(4) 0.039(3) 0.007(3) -0.003(3) -0.003(3) 
C46 0.045(4) 0.027(3) 0.061(4) 0.007(3) -0.007(3) -0.002(3) 
C47 0.048(4) 0.034(3) 0.057(4) -0.008(3) -0.002(3) 0.014(3) 
C48 0.030(3) 0.051(4) 0.046(4) -0.004(3) -0.005(3) 0.010(3) 
C49 0.044(4) 0.057(4) 0.034(3) -0.007(3) 0.008(3) 0.007(3) 
C50 0.037(3) 0.058(4) 0.034(3) 0.003(3) 0.002(3) -0.004(3) 
C51 0.027(3) 0.062(4) 0.047(4) 0.003(3) 0.004(3) -0.004(3) 
C52 0.029(3) 0.051(4) 0.052(4) 0.006(3) -0.002(3) -0.016(3) 
C53 0.026(3) 0.057(4) 0.044(4) -0.002(3) -0.011(3) -0.007(3) 
C54 0.035(3) 0.058(4) 0.041(4) 0.003(3) -0.015(3) 0.006(3) 
C55 0.045(4) 0.047(4) 0.032(3) 0.003(3) -0.015(3) 0.010(3) 
C56 0.049(4) 0.057(4) 0.038(3) 0.015(3) -0.011(3) 0.006(3) 
C57 0.038(3) 0.042(4) 0.050(4) 0.011(3) -0.004(3) 0.010(3) 
C58 0.053(4) 0.035(3) 0.045(4) 0.002(3) -0.004(3) 0.010(3) 
C59 0.029(3) 0.045(4) 0.057(4) 0.000(3) 0.003(3) 0.006(3) 
C60 0.031(3) 0.048(4) 0.047(4) -0.001(3) -0.009(3) 0.007(3) 
C61 0.055(5) 0.047(5) 0.112(8) -0.038(5) -0.012(5) 0.008(4) 
C62 0.060(5) 0.066(5) 0.072(5) -0.045(5) -0.016(4) 0.010(4) 
C63 0.070(6) 0.100(7) 0.043(4) -0.033(5) 0.006(4) -0.016(6) 
C64 0.103(8) 0.138(10) 0.021(4) -0.010(5) -0.012(4) -0.042(7) 
C65 0.099(7) 0.109(8) 0.022(4) 0.019(4) -0.010(4) -0.038(6) 
C66 0.082(7) 0.119(9) 0.061(6) 0.059(6) -0.004(5) 0.010(7) 
C67 0.082(7) 0.137(10) 0.077(7) 0.055(7) -0.018(6) 0.029(7) 
C68 0.093(7) 0.061(5) 0.064(6) 0.018(4) -0.005(5) 0.039(5) 
C69 0.047(4) 0.048(4) 0.077(6) -0.012(4) -0.010(4) 0.018(3) 
C70 0.067(5) 0.052(5) 0.073(6) -0.019(4) 0.008(4) 0.021(4) 
C71 0.086(7) 0.145(10) 0.050(5) -0.029(6) 0.015(5) 0.050(7) 
C72 0.113(9) 0.141(11) 0.061(6) -0.026(7) 0.036(6) 0.029(8) 
C73 0.084(6) 0.090(7) 0.039(4) 0.001(4) 0.025(4) -0.014(5) 
C74 0.106(8) 0.124(9) 0.026(4) 0.022(5) -0.012(4) -0.040(7) 
C75 0.081(8) 0.138(11) 0.087(8) 0.084(8) 0.003(6) 0.014(8) 
C76 0.109(9) 0.055(5) 0.095(8) 0.035(5) 0.034(7) 0.000(6) 
C77 0.095(8) 0.041(5) 0.168(13) 0.041(7) 0.021(9) 0.019(5) 
C78 0.124(9) 0.029(4) 0.103(8) -0.002(5) -0.037(7) -0.005(5) 
C79 0.056(4) 0.044(4) 0.049(4) -0.014(3) -0.015(3) -0.016(3) 
C80 0.048(4) 0.057(4) 0.041(4) -0.010(3) -0.019(3) -0.008(3) 
C81 0.069(5) 0.090(6) 0.040(4) -0.004(4) -0.025(4) -0.016(5) 
C82 0.065(6) 0.088(7) 0.090(7) 0.042(6) -0.051(5) -0.016(5) 
C83 0.031(3) 0.077(5) 0.056(4) -0.010(4) -0.015(3) 0.009(3) 
C84 0.029(3) 0.080(6) 0.082(6) -0.009(5) -0.007(4) 0.019(4) 
C85 0.035(4) 0.091(7) 0.084(7) -0.002(5) 0.014(4) -0.002(4) 
C86 0.041(4) 0.143(10) 0.050(5) 0.013(6) 0.007(4) -0.026(5) 
C87 0.053(5) 0.113(8) 0.052(5) 0.025(5) 0.015(4) -0.020(5) 
C88 0.086(7) 0.087(7) 0.053(5) 0.022(5) 0.006(5) -0.043(6) 
C89 0.117(9) 0.092(8) 0.101(9) -0.004(7) 0.014(7) -0.076(8) 
C90 0.110(8) 0.056(5) 0.091(7) -0.018(5) 0.009(6) -0.052(6) 
C91 0.035(4) 0.066(5) 0.063(5) -0.018(4) -0.015(3) -0.012(3) 
C92 0.032(4) 0.065(5) 0.087(6) 0.007(5) -0.005(4) -0.022(4) 
C93 0.058(5) 0.046(4) 0.090(6) -0.015(4) 0.007(5) 0.015(4) 
C94 0.071(6) 0.174(12) 0.055(6) -0.038(7) 0.012(5) 0.064(7) 
C95 0.076(7) 0.126(9) 0.064(6) -0.039(6) 0.029(5) 0.006(6) 
C96 0.084(6) 0.072(6) 0.043(4) 0.000(4) 0.030(4) -0.007(5) 
C97 0.121(9) 0.052(5) 0.077(7) 0.030(5) 0.023(7) 0.000(6) 
C98 0.086(7) 0.041(5) 0.143(10) 0.033(6) 0.044(7) 0.017(5) 
C99 0.098(8) 0.031(4) 0.097(7) 0.000(4) -0.020(6) -0.012(4) 
C100 0.056(5) 0.049(5) 0.102(7) -0.036(5) -0.016(5) 0.007(4) 
C101 0.079(6) 0.061(5) 0.080(6) -0.041(5) -0.013(5) 0.007(5) 
C102 0.065(6) 0.145(10) 0.039(4) -0.043(6) -0.002(4) -0.013(7) 
C103 0.104(8) 0.139(10) 0.026(4) -0.007(5) -0.010(5) -0.028(8) 
C104 0.101(9) 0.115(10) 0.106(9) 0.064(8) -0.040(7) 0.016(8) 
C105 0.110(8) 0.053(5) 0.083(7) 0.020(5) -0.017(6) 0.043(6) 
C106 0.050(4) 0.049(5) 0.097(7) -0.005(5) -0.026(4) 0.018(4) 
C107 0.030(4) 0.073(6) 0.094(7) -0.011(5) 0.013(4) 0.006(4) 
C108 0.034(4) 0.128(9) 0.074(6) 0.011(6) 0.014(4) -0.024(5) 
C109 0.038(4) 0.110(8) 0.058(5) 0.021(5) 0.015(4) -0.012(5) 
C110 0.076(6) 0.065(5) 0.067(6) 0.014(4) 0.000(5) -0.035(5) 
C111 0.099(8) 0.081(7) 0.112(9) -0.003(7) 0.006(7) -0.062(7) 
C112 0.108(8) 0.063(6) 0.100(8) -0.037(6) 0.016(7) -0.049(6) 
C113 0.055(5) 0.055(5) 0.064(5) -0.025(4) -0.023(4) -0.005(4) 
C114 0.058(5) 0.072(5) 0.051(4) -0.014(4) -0.024(4) -0.013(4) 
C115 0.075(6) 0.097(7) 0.034(4) -0.001(4) -0.028(4) -0.012(5) 
C116 0.089(7) 0.091(7) 0.096(7) 0.049(6) -0.068(6) -0.019(6) 
C117 0.037(4) 0.074(6) 0.075(6) -0.006(5) -0.022(4) 0.016(4) 
C118 0.039(4) 0.074(6) 0.086(6) -0.012(5) -0.017(4) 0.025(4) 
C119 0.028(3) 0.064(5) 0.091(6) 0.003(5) -0.015(4) -0.013(3) 
C120 0.036(4) 0.063(5) 0.070(5) -0.024(4) -0.017(3) 0.000(3) 
C121 0.037(3) 0.038(3) 0.026(3) 0.002(2) -0.005(2) -0.002(3) 
C122 0.029(3) 0.033(3) 0.025(3) 0.006(2) -0.002(2) 0.001(2) 
C123 0.032(3) 0.027(3) 0.027(3) 0.001(2) -0.005(2) 0.000(2) 
C124 0.035(3) 0.033(3) 0.035(3) 0.002(2) 0.000(2) 0.007(3) 
C125 0.026(3) 0.032(3) 0.032(3) 0.001(2) -0.004(2) 0.008(2) 
C126 0.027(3) 0.033(3) 0.032(3) 0.007(2) -0.001(2) -0.001(2) 
C127 0.029(3) 0.028(3) 0.039(3) -0.002(2) -0.007(2) 0.001(2) 
C128 0.031(3) 0.031(3) 0.029(3) -0.005(2) -0.003(2) 0.002(2) 
C129 0.034(3) 0.035(3) 0.042(3) -0.006(3) -0.002(3) -0.005(3) 
C130 0.034(3) 0.046(4) 0.030(3) -0.011(3) -0.005(2) -0.005(3) 
C131 0.034(3) 0.045(3) 0.027(3) -0.004(3) -0.003(2) 0.005(3) 
C132 0.033(3) 0.027(3) 0.033(3) -0.005(2) 0.006(2) 0.005(2) 
C133 0.030(3) 0.036(3) 0.028(3) -0.005(2) -0.002(2) 0.007(2) 
C134 0.030(3) 0.031(3) 0.026(3) 0.001(2) -0.005(2) 0.001(2) 
C135 0.028(3) 0.031(3) 0.030(3) 0.000(2) -0.003(2) 0.001(2) 
C136 0.028(3) 0.033(3) 0.028(3) 0.003(2) -0.012(2) -0.002(2) 
C137 0.032(3) 0.031(3) 0.028(3) 0.002(2) -0.005(2) 0.000(2) 
C138 0.025(3) 0.037(3) 0.031(3) -0.001(2) -0.008(2) 0.004(2) 
C139 0.029(3) 0.034(3) 0.023(3) -0.005(2) -0.007(2) -0.006(2) 
C140 0.025(3) 0.037(3) 0.026(3) -0.004(2) -0.004(2) 0.002(2) 
C141 0.034(3) 0.031(3) 0.027(3) 0.000(2) -0.010(2) -0.001(2) 
C142 0.036(3) 0.039(3) 0.030(3) 0.000(3) -0.010(2) 0.001(3) 
C143 0.051(4) 0.041(4) 0.027(3) 0.003(3) -0.005(3) -0.004(3) 
C144 0.050(4) 0.047(4) 0.034(3) 0.007(3) -0.005(3) -0.010(3) 
C145 0.067(4) 0.036(3) 0.032(3) 0.008(3) -0.014(3) -0.007(3) 
C146 0.043(3) 0.038(3) 0.033(3) 0.003(3) -0.005(3) 0.003(3) 
C147 0.034(3) 0.038(3) 0.030(3) 0.004(2) -0.008(2) 0.001(3) 
C148 0.029(3) 0.031(3) 0.031(3) -0.003(2) -0.006(2) -0.006(2) 
C149 0.027(3) 0.038(3) 0.029(3) -0.009(2) -0.005(2) 0.000(2) 
C150 0.028(3) 0.034(3) 0.022(3) -0.004(2) -0.003(2) 0.001(2) 
C151 0.030(3) 0.041(3) 0.020(3) -0.001(2) -0.002(2) 0.000(3) 
C152 0.034(3) 0.034(3) 0.032(3) 0.002(2) -0.001(2) -0.002(3) 
C153 0.028(3) 0.035(3) 0.025(3) -0.002(2) 0.000(2) -0.005(2) 
C154 0.039(3) 0.024(3) 0.026(3) -0.001(2) 0.000(2) 0.001(2) 
C155 0.027(3) 0.032(3) 0.028(3) 0.002(2) 0.001(2) 0.003(2) 
C156 0.030(3) 0.035(3) 0.029(3) 0.002(2) -0.004(2) -0.004(2) 
C157 0.030(3) 0.035(3) 0.038(3) -0.002(3) -0.002(2) 0.005(3) 
C158 0.031(3) 0.051(4) 0.034(3) -0.006(3) -0.002(2) 0.004(3) 
C159 0.035(3) 0.043(3) 0.032(3) 0.003(3) -0.007(2) -0.010(3) 
C160 0.033(3) 0.036(3) 0.032(3) 0.000(2) -0.009(2) -0.005(3) 
C161 0.027(3) 0.036(3) 0.027(3) -0.001(2) -0.009(2) 0.000(2) 
C162 0.031(3) 0.032(3) 0.027(3) -0.005(2) 0.000(2) 0.000(2) 
C163 0.034(3) 0.024(3) 0.030(3) 0.002(2) -0.002(2) -0.003(2) 
C164 0.032(3) 0.032(3) 0.021(3) -0.002(2) -0.002(2) 0.003(2) 
C165 0.039(3) 0.044(4) 0.032(3) -0.004(3) -0.007(3) 0.007(3) 
C166 0.050(4) 0.038(3) 0.037(3) 0.000(3) -0.009(3) 0.004(3) 
C167 0.059(4) 0.051(4) 0.036(3) -0.002(3) -0.007(3) 0.014(4) 
C168 0.043(4) 0.076(5) 0.039(4) -0.006(4) -0.006(3) 0.006(4) 
C169 0.052(4) 0.061(5) 0.036(3) -0.006(3) -0.001(3) -0.008(4) 
C170 0.056(4) 0.048(4) 0.036(3) 0.002(3) -0.007(3) -0.004(3) 
C171 0.116(9) 0.081(7) 0.094(8) -0.015(6) -0.024(7) 0.056(7) 
C172 0.034(4) 0.034(4) 0.172(11) 0.012(5) 0.020(5) 0.003(3) 
C173 0.125(11) 0.068(7) 0.251(18) -0.061(10) -0.113(13) 0.057(7) 
C174 0.036(4) 0.027(3) 0.095(6) -0.005(4) 0.028(4) 0.013(3) 
C175 0.164(12) 0.100(8) 0.084(8) 0.003(6) 0.020(8) 0.080(9) 
C176 0.052(5) 0.062(5) 0.082(6) 0.010(5) 0.025(4) 0.000(4) 
C177 0.068(5) 0.034(4) 0.073(6) -0.012(4) 0.007(4) -0.004(4) 
C178 0.074(10) 0.024(6) 0.046(8) -0.012(6) -0.008(7) -0.011(7) 
C179 0.115(14) 0.020(6) 0.053(9) 0.005(6) 0.037(9) -0.004(8) 
C180 0.076(12) 0.030(7) 0.092(14) -0.026(8) -0.016(10) 0.000(7) 
 
_geom_special_details 
; 
 All esds (except the esd in the dihedral angle between two l.s. planes) 
 are estimated using the full covariance matrix.  The cell esds are taken 
 into account individually in the estimation of esds in distances, angles 
 and torsion angles; correlations between esds in cell parameters are only 
 used when they are defined by crystal symmetry.  An approximate (isotropic) 
 treatment of cell esds is used for estimating esds involving l.s. planes. 
; 
 
loop_ 
 _geom_bond_atom_site_label_1 
 _geom_bond_atom_site_label_2 
 _geom_bond_distance 
 _geom_bond_site_symmetry_2 
 _geom_bond_publ_flag 
Cl1 C165 1.743(6) . ? 
Cl2 C171 1.700(11) . ? 
Cl3 C180 1.49(2) . ? 
Cl3 C178 1.652(14) . ? 
Cl3 C179 1.81(2) . ? 
S1 C128 1.769(6) . ? 
S1 C127 1.774(6) . ? 
S2 C133 1.752(6) . ? 
S2 C134 1.763(6) . ? 
S3 C141 1.753(6) . ? 
S3 C142 1.765(6) . ? 
S4 C147 1.768(6) . ? 
S4 C148 1.773(6) . ? 
S5 C155 1.763(5) . ? 
S5 C156 1.774(6) . ? 
S6 C161 1.759(6) . ? 
S6 C162 1.763(6) . ? 
C1 C33 1.388(9) . ? 
C1 C2 1.446(9) . ? 
C1 C18 1.452(9) . ? 
C2 C3 1.378(9) . ? 
C2 C19 1.436(9) . ? 
C3 C35 1.447(9) . ? 
C3 C4 1.457(10) . ? 
C4 C21 1.370(9) . ? 
C4 C5 1.458(9) . ? 
C5 C6 1.381(9) . ? 
C5 C36 1.431(9) . ? 
C6 C37 1.460(9) . ? 
C6 C7 1.465(9) . ? 
C7 C22 1.367(9) . ? 
C7 C8 1.449(9) . ? 
C8 C9 1.381(9) . ? 
C8 C38 1.461(9) . ? 
C9 C10 1.449(9) . ? 
C9 C24 1.452(9) . ? 
C10 C40 1.392(9) . ? 
C10 C11 1.444(9) . ? 
C11 C12 1.367(9) . ? 
C11 C25 1.480(9) . ? 
C12 C42 1.446(9) . ? 
C12 C13 1.456(9) . ? 
C13 C27 1.367(9) . ? 
C13 C14 1.444(9) . ? 
C14 C15 1.389(9) . ? 
C14 C43 1.460(9) . ? 
C15 C16 1.445(8) . ? 
C15 C44 1.454(9) . ? 
C16 C28 1.392(9) . ? 
C16 C17 1.456(9) . ? 
C17 C18 1.398(9) . ? 
C17 C45 1.432(9) . ? 
C18 C30 1.447(9) . ? 
C19 C20 1.388(9) . ? 
C19 C30 1.456(9) . ? 
C20 C21 1.442(9) . ? 
C20 C31 1.447(9) . ? 
C21 C22 1.458(10) . ? 
C22 C23 1.446(9) . ? 
C23 C24 1.386(9) . ? 
C23 C31 1.452(9) . ? 
C24 C25 1.431(9) . ? 
C25 C26 1.381(9) . ? 
C26 C32 1.441(9) . ? 
C26 C27 1.456(9) . ? 
C27 C28 1.457(9) . ? 
C28 C29 1.440(8) . ? 
C29 C30 1.378(9) . ? 
C29 C32 1.455(9) . ? 
C31 C32 1.366(8) . ? 
C33 C34 1.442(9) . ? 
C33 C46 1.452(9) . ? 
C34 C35 1.384(9) . ? 
C34 C47 1.446(9) . ? 
C35 C36 1.469(10) . ? 
C36 C49 1.391(9) . ? 
C37 C50 1.385(9) . ? 
C37 C38 1.451(9) . ? 
C38 C39 1.378(9) . ? 
C39 C52 1.456(9) . ? 
C39 C40 1.460(9) . ? 
C40 C41 1.431(9) . ? 
C41 C42 1.391(9) . ? 
C41 C53 1.447(9) . ? 
C42 C43 1.464(9) . ? 
C43 C55 1.371(9) . ? 
C44 C56 1.373(9) . ? 
C44 C45 1.463(9) . ? 
C45 C46 1.381(9) . ? 
C46 C58 1.433(9) . ? 
C47 C48 1.381(9) . ? 
C47 C58 1.446(9) . ? 
C48 C59 1.456(9) . ? 
C48 C49 1.457(9) . ? 
C49 C50 1.436(9) . ? 
C50 C51 1.454(9) . ? 
C51 C52 1.375(9) . ? 
C51 C59 1.449(9) . ? 
C52 C53 1.475(9) . ? 
C53 C54 1.377(9) . ? 
C54 C60 1.433(9) . ? 
C54 C55 1.443(9) . ? 
C55 C56 1.471(9) . ? 
C56 C57 1.445(9) . ? 
C57 C58 1.389(9) . ? 
C57 C60 1.456(9) . ? 
C59 C60 1.392(9) . ? 
C61 C93 1.403(11) . ? 
C61 C62 1.408(12) . ? 
C61 C78 1.461(14) . ? 
C62 C79 1.416(11) . ? 
C62 C63 1.436(13) . ? 
C63 C64 1.403(14) . ? 
C63 C95 1.447(13) . ? 
C64 C81 1.352(13) . ? 
C64 C65 1.492(13) . ? 
C65 C66 1.368(14) . ? 
C65 C96 1.435(13) . ? 
C66 C97 1.413(15) . ? 
C66 C67 1.479(14) . ? 
C67 C82 1.267(14) . ? 
C67 C68 1.446(14) . ? 
C68 C69 1.384(12) . ? 
C68 C98 1.430(14) . ? 
C69 C70 1.416(11) . ? 
C69 C84 1.463(11) . ? 
C70 C100 1.392(11) . ? 
C70 C71 1.466(14) . ? 
C71 C72 1.276(14) . ? 
C71 C85 1.542(14) . ? 
C72 C102 1.482(15) . ? 
C72 C73 1.487(15) . ? 
C73 C87 1.347(12) . ? 
C73 C74 1.437(14) . ? 
C74 C75 1.354(16) . ? 
C74 C103 1.491(14) . ? 
C75 C76 1.448(17) . ? 
C75 C104 1.509(16) . ? 
C76 C88 1.360(14) . ? 
C76 C77 1.471(15) . ? 
C77 C78 1.299(15) . ? 
C77 C105 1.429(15) . ? 
C78 C90 1.611(15) . ? 
C79 C90 1.394(12) . ? 
C79 C80 1.400(10) . ? 
C80 C81 1.392(11) . ? 
C80 C91 1.426(10) . ? 
C81 C82 1.589(14) . ? 
C82 C83 1.465(12) . ? 
C83 C84 1.359(10) . ? 
C83 C91 1.421(11) . ? 
C84 C85 1.431(12) . ? 
C85 C86 1.342(13) . ? 
C86 C92 1.438(12) . ? 
C86 C87 1.459(12) . ? 
C87 C88 1.411(13) . ? 
C88 C89 1.506(14) . ? 
C89 C90 1.256(14) . ? 
C89 C92 1.476(15) . ? 
C91 C92 1.396(11) . ? 
C93 C106 1.413(12) . ? 
C93 C94 1.485(14) . ? 
C94 C95 1.300(13) . ? 
C94 C107 1.540(13) . ? 
C95 C96 1.489(14) . ? 
C96 C109 1.343(12) . ? 
C97 C110 1.352(13) . ? 
C97 C98 1.468(13) . ? 
C98 C99 1.334(14) . ? 
C99 C100 1.423(13) . ? 
C99 C112 1.596(15) . ? 
C100 C101 1.424(12) . ? 
C101 C113 1.421(12) . ? 
C101 C102 1.424(14) . ? 
C102 C103 1.405(15) . ? 
C103 C115 1.345(13) . ? 
C104 C116 1.263(14) . ? 
C104 C105 1.429(16) . ? 
C105 C106 1.429(13) . ? 
C106 C118 1.465(11) . ? 
C107 C108 1.356(13) . ? 
C107 C118 1.430(12) . ? 
C108 C119 1.446(12) . ? 
C108 C109 1.456(12) . ? 
C109 C110 1.437(13) . ? 
C110 C111 1.517(14) . ? 
C111 C112 1.255(14) . ? 
C111 C119 1.455(14) . ? 
C112 C113 1.430(13) . ? 
C113 C114 1.390(11) . ? 
C114 C115 1.393(12) . ? 
C114 C120 1.423(11) . ? 
C115 C116 1.603(14) . ? 
C116 C117 1.507(14) . ? 
C117 C118 1.362(11) . ? 
C117 C120 1.431(11) . ? 
C119 C120 1.398(11) . ? 
C121 C122 1.530(7) . ? 
C122 C137 1.592(7) . ? 
C122 C123 1.596(7) . ? 
C122 C151 1.601(8) . ? 
C123 C125 1.514(7) . ? 
C123 C164 1.515(7) . ? 
C123 C124 1.516(7) . ? 
C125 C126 1.379(8) . ? 
C125 C136 1.389(8) . ? 
C126 C127 1.372(8) . ? 
C127 C134 1.401(8) . ? 
C128 C129 1.375(7) . ? 
C128 C133 1.399(8) . ? 
C129 C130 1.390(8) . ? 
C130 C131 1.375(8) . ? 
C131 C132 1.392(8) . ? 
C132 C133 1.387(8) . ? 
C134 C135 1.390(7) . ? 
C135 C136 1.380(7) . ? 
C136 C137 1.521(7) . ? 
C137 C139 1.527(8) . ? 
C137 C138 1.542(7) . ? 
C139 C140 1.375(7) . ? 
C139 C150 1.385(7) . ? 
C140 C141 1.403(8) . ? 
C141 C148 1.401(8) . ? 
C142 C147 1.377(8) . ? 
C142 C143 1.385(8) . ? 
C143 C144 1.381(9) . ? 
C144 C145 1.386(9) . ? 
C145 C146 1.369(9) . ? 
C146 C147 1.395(8) . ? 
C148 C149 1.383(8) . ? 
C149 C150 1.400(8) . ? 
C150 C151 1.506(7) . ? 
C151 C153 1.519(7) . ? 
C151 C152 1.536(7) . ? 
C153 C154 1.382(7) . ? 
C153 C164 1.388(8) . ? 
C154 C155 1.388(7) . ? 
C155 C162 1.395(8) . ? 
C156 C157 1.386(8) . ? 
C156 C161 1.387(8) . ? 
C157 C158 1.378(8) . ? 
C158 C159 1.399(8) . ? 
C159 C160 1.388(8) . ? 
C160 C161 1.394(8) . ? 
C162 C163 1.385(7) . ? 
C163 C164 1.397(7) . ? 
C165 C170 1.376(9) . ? 
C165 C166 1.386(8) . ? 
C166 C167 1.375(9) . ? 
C167 C168 1.374(10) . ? 
C168 C169 1.387(10) . ? 
C169 C170 1.381(9) . ? 
C171 C176 1.384(14) . ? 
C171 C172 1.420(14) . ? 
C172 C173 1.434(17) . ? 
C173 C174 1.459(19) . ? 
C174 C175 1.531(16) . ? 
C175 C176 1.367(14) . ? 
C177 C179 1.291(17) . ? 
C177 C180 1.319(19) 3_656 ? 
C177 C178 1.369(16) 3_656 ? 
C177 C178 1.485(17) . ? 
C178 C180 1.19(2) . ? 
C178 C177 1.369(16) 3_656 ? 
C178 C178 1.48(3) 3_656 ? 
C178 C179 1.52(2) . ? 
C180 C177 1.319(19) 3_656 ? 
 
loop_ 
 _geom_angle_atom_site_label_1 
 _geom_angle_atom_site_label_2 
 _geom_angle_atom_site_label_3 
 _geom_angle 
 _geom_angle_site_symmetry_1 
 _geom_angle_site_symmetry_3 
 _geom_angle_publ_flag 
C180 Cl3 C178 44.3(8) . . ? 
C180 Cl3 C179 96.0(8) . . ? 
C178 Cl3 C179 51.7(7) . . ? 
C128 S1 C127 103.4(3) . . ? 
C133 S2 C134 102.3(3) . . ? 
C141 S3 C142 103.2(3) . . ? 
C147 S4 C148 103.5(3) . . ? 
C155 S5 C156 102.1(3) . . ? 
C161 S6 C162 101.9(3) . . ? 
C33 C1 C2 120.6(6) . . ? 
C33 C1 C18 119.4(6) . . ? 
C2 C1 C18 107.7(6) . . ? 
C3 C2 C19 119.8(6) . . ? 
C3 C2 C1 119.4(6) . . ? 
C19 C2 C1 108.7(5) . . ? 
C2 C3 C35 120.4(6) . . ? 
C2 C3 C4 119.8(6) . . ? 
C35 C3 C4 108.0(6) . . ? 
C21 C4 C3 120.1(6) . . ? 
C21 C4 C5 120.8(6) . . ? 
C3 C4 C5 107.7(6) . . ? 
C6 C5 C36 120.7(6) . . ? 
C6 C5 C4 119.4(6) . . ? 
C36 C5 C4 108.6(6) . . ? 
C5 C6 C37 119.9(6) . . ? 
C5 C6 C7 119.8(6) . . ? 
C37 C6 C7 107.3(6) . . ? 
C22 C7 C8 119.9(6) . . ? 
C22 C7 C6 120.0(6) . . ? 
C8 C7 C6 108.4(6) . . ? 
C9 C8 C7 120.1(6) . . ? 
C9 C8 C38 119.7(6) . . ? 
C7 C8 C38 107.9(6) . . ? 
C8 C9 C10 120.1(6) . . ? 
C8 C9 C24 120.4(6) . . ? 
C10 C9 C24 107.7(6) . . ? 
C40 C10 C11 119.3(6) . . ? 
C40 C10 C9 121.2(6) . . ? 
C11 C10 C9 108.7(6) . . ? 
C12 C11 C10 120.7(6) . . ? 
C12 C11 C25 120.3(6) . . ? 
C10 C11 C25 107.1(6) . . ? 
C11 C12 C42 119.7(6) . . ? 
C11 C12 C13 119.9(6) . . ? 
C42 C12 C13 108.2(6) . . ? 
C27 C13 C14 120.9(6) . . ? 
C27 C13 C12 120.1(6) . . ? 
C14 C13 C12 107.4(6) . . ? 
C15 C14 C13 119.8(6) . . ? 
C15 C14 C43 118.5(6) . . ? 
C13 C14 C43 109.4(6) . . ? 
C14 C15 C16 119.6(6) . . ? 
C14 C15 C44 121.0(6) . . ? 
C16 C15 C44 107.8(6) . . ? 
C28 C16 C15 120.3(6) . . ? 
C28 C16 C17 119.9(6) . . ? 
C15 C16 C17 108.1(6) . . ? 
C18 C17 C45 120.8(6) . . ? 
C18 C17 C16 118.9(6) . . ? 
C45 C17 C16 108.3(6) . . ? 
C17 C18 C30 120.6(6) . . ? 
C17 C18 C1 119.2(6) . . ? 
C30 C18 C1 107.8(5) . . ? 
C20 C19 C2 120.6(6) . . ? 
C20 C19 C30 119.0(6) . . ? 
C2 C19 C30 107.7(6) . . ? 
C19 C20 C21 119.4(6) . . ? 
C19 C20 C31 120.2(6) . . ? 
C21 C20 C31 108.9(6) . . ? 
C4 C21 C20 120.4(6) . . ? 
C4 C21 C22 119.4(6) . . ? 
C20 C21 C22 108.0(6) . . ? 
C7 C22 C23 120.2(6) . . ? 
C7 C22 C21 120.5(7) . . ? 
C23 C22 C21 107.1(6) . . ? 
C24 C23 C22 120.8(6) . . ? 
C24 C23 C31 119.6(6) . . ? 
C22 C23 C31 109.1(6) . . ? 
C23 C24 C25 119.5(6) . . ? 
C23 C24 C9 118.7(6) . . ? 
C25 C24 C9 108.8(6) . . ? 
C26 C25 C24 121.0(6) . . ? 
C26 C25 C11 119.2(6) . . ? 
C24 C25 C11 107.8(6) . . ? 
C25 C26 C32 119.4(6) . . ? 
C25 C26 C27 119.7(6) . . ? 
C32 C26 C27 109.4(6) . . ? 
C13 C27 C26 120.8(6) . . ? 
C13 C27 C28 119.9(6) . . ? 
C26 C27 C28 106.4(6) . . ? 
C16 C28 C29 120.3(6) . . ? 
C16 C28 C27 119.4(6) . . ? 
C29 C28 C27 108.8(6) . . ? 
C30 C29 C28 120.3(6) . . ? 
C30 C29 C32 119.4(6) . . ? 
C28 C29 C32 108.2(6) . . ? 
C29 C30 C18 119.9(6) . . ? 
C29 C30 C19 120.7(6) . . ? 
C18 C30 C19 108.0(6) . . ? 
C32 C31 C20 120.3(6) . . ? 
C32 C31 C23 120.2(6) . . ? 
C20 C31 C23 106.9(6) . . ? 
C31 C32 C26 120.3(6) . . ? 
C31 C32 C29 120.4(6) . . ? 
C26 C32 C29 107.2(5) . . ? 
C1 C33 C34 119.6(6) . . ? 
C1 C33 C46 121.1(6) . . ? 
C34 C33 C46 107.6(6) . . ? 
C35 C34 C33 120.0(6) . . ? 
C35 C34 C47 120.0(6) . . ? 
C33 C34 C47 107.9(6) . . ? 
C34 C35 C3 120.0(6) . . ? 
C34 C35 C36 120.2(6) . . ? 
C3 C35 C36 107.8(6) . . ? 
C49 C36 C5 119.5(6) . . ? 
C49 C36 C35 119.6(6) . . ? 
C5 C36 C35 108.0(6) . . ? 
C50 C37 C38 120.0(6) . . ? 
C50 C37 C6 119.1(6) . . ? 
C38 C37 C6 108.3(6) . . ? 
C39 C38 C37 119.3(6) . . ? 
C39 C38 C8 119.7(6) . . ? 
C37 C38 C8 108.1(6) . . ? 
C38 C39 C52 120.6(6) . . ? 
C38 C39 C40 121.3(6) . . ? 
C52 C39 C40 106.7(6) . . ? 
C10 C40 C41 120.5(6) . . ? 
C10 C40 C39 118.0(6) . . ? 
C41 C40 C39 109.4(6) . . ? 
C42 C41 C40 119.4(6) . . ? 
C42 C41 C53 119.9(6) . . ? 
C40 C41 C53 108.5(6) . . ? 
C41 C42 C12 120.3(6) . . ? 
C41 C42 C43 118.9(6) . . ? 
C12 C42 C43 108.7(6) . . ? 
C55 C43 C14 120.8(6) . . ? 
C55 C43 C42 120.4(6) . . ? 
C14 C43 C42 106.3(6) . . ? 
C56 C44 C15 120.1(6) . . ? 
C56 C44 C45 120.3(6) . . ? 
C15 C44 C45 107.7(5) . . ? 
C46 C45 C17 120.6(6) . . ? 
C46 C45 C44 119.1(6) . . ? 
C17 C45 C44 108.0(6) . . ? 
C45 C46 C58 120.8(6) . . ? 
C45 C46 C33 119.0(6) . . ? 
C58 C46 C33 108.6(6) . . ? 
C48 C47 C58 119.5(6) . . ? 
C48 C47 C34 120.0(6) . . ? 
C58 C47 C34 108.3(6) . . ? 
C47 C48 C59 120.5(6) . . ? 
C47 C48 C49 120.9(6) . . ? 
C59 C48 C49 107.5(6) . . ? 
C36 C49 C50 120.4(6) . . ? 
C36 C49 C48 119.3(6) . . ? 
C50 C49 C48 109.0(6) . . ? 
C37 C50 C49 120.4(6) . . ? 
C37 C50 C51 120.6(6) . . ? 
C49 C50 C51 107.2(6) . . ? 
C52 C51 C59 120.4(6) . . ? 
C52 C51 C50 119.2(6) . . ? 
C59 C51 C50 109.0(6) . . ? 
C51 C52 C39 120.2(6) . . ? 
C51 C52 C53 119.2(6) . . ? 
C39 C52 C53 108.2(6) . . ? 
C54 C53 C41 120.6(6) . . ? 
C54 C53 C52 119.7(6) . . ? 
C41 C53 C52 107.2(6) . . ? 
C53 C54 C60 120.9(6) . . ? 
C53 C54 C55 119.7(6) . . ? 
C60 C54 C55 108.2(6) . . ? 
C43 C55 C54 120.4(6) . . ? 
C43 C55 C56 120.2(6) . . ? 
C54 C55 C56 107.7(6) . . ? 
C44 C56 C57 119.8(6) . . ? 
C44 C56 C55 119.4(7) . . ? 
C57 C56 C55 107.7(6) . . ? 
C58 C57 C56 120.3(6) . . ? 
C58 C57 C60 120.0(6) . . ? 
C56 C57 C60 107.4(6) . . ? 
C57 C58 C46 119.7(6) . . ? 
C57 C58 C47 120.6(6) . . ? 
C46 C58 C47 107.7(6) . . ? 
C60 C59 C51 120.2(6) . . ? 
C60 C59 C48 120.0(6) . . ? 
C51 C59 C48 107.3(6) . . ? 
C59 C60 C54 119.6(6) . . ? 
C59 C60 C57 119.4(6) . . ? 
C54 C60 C57 108.9(6) . . ? 
C93 C61 C62 120.8(10) . . ? 
C93 C61 C78 117.7(9) . . ? 
C62 C61 C78 109.4(8) . . ? 
C61 C62 C79 111.6(9) . . ? 
C61 C62 C63 117.6(8) . . ? 
C79 C62 C63 119.7(8) . . ? 
C64 C63 C62 118.8(8) . . ? 
C64 C63 C95 106.9(10) . . ? 
C62 C63 C95 121.6(10) . . ? 
C81 C64 C63 120.6(10) . . ? 
C81 C64 C65 117.7(11) . . ? 
C63 C64 C65 109.3(9) . . ? 
C66 C65 C96 120.2(9) . . ? 
C66 C65 C64 120.0(10) . . ? 
C96 C65 C64 108.5(10) . . ? 
C65 C66 C97 119.2(9) . . ? 
C65 C66 C67 121.1(12) . . ? 
C97 C66 C67 108.0(11) . . ? 
C82 C67 C68 117.6(11) . . ? 
C82 C67 C66 122.2(13) . . ? 
C68 C67 C66 108.2(11) . . ? 
C69 C68 C98 119.4(9) . . ? 
C69 C68 C67 123.1(10) . . ? 
C98 C68 C67 106.7(10) . . ? 
C68 C69 C70 120.3(8) . . ? 
C68 C69 C84 117.4(8) . . ? 
C70 C69 C84 110.0(8) . . ? 
C100 C70 C69 119.7(9) . . ? 
C100 C70 C71 120.0(9) . . ? 
C69 C70 C71 108.0(8) . . ? 
C72 C71 C70 122.4(12) . . ? 
C72 C71 C85 118.7(12) . . ? 
C70 C71 C85 107.0(8) . . ? 
C71 C72 C102 119.3(13) . . ? 
C71 C72 C73 119.8(12) . . ? 
C102 C72 C73 109.2(11) . . ? 
C87 C73 C74 120.6(10) . . ? 
C87 C73 C72 122.6(10) . . ? 
C74 C73 C72 105.1(10) . . ? 
C75 C74 C73 119.5(10) . . ? 
C75 C74 C103 119.3(12) . . ? 
C73 C74 C103 109.9(11) . . ? 
C74 C75 C76 120.4(10) . . ? 
C74 C75 C104 123.2(13) . . ? 
C76 C75 C104 104.8(13) . . ? 
C88 C76 C75 118.1(10) . . ? 
C88 C76 C77 120.0(12) . . ? 
C75 C76 C77 109.1(11) . . ? 
C78 C77 C105 121.7(12) . . ? 
C78 C77 C76 119.2(12) . . ? 
C105 C77 C76 108.3(12) . . ? 
C77 C78 C61 121.9(11) . . ? 
C77 C78 C90 122.8(11) . . ? 
C61 C78 C90 102.7(8) . . ? 
C90 C79 C80 119.9(8) . . ? 
C90 C79 C62 109.6(8) . . ? 
C80 C79 C62 118.8(7) . . ? 
C81 C80 C79 120.3(7) . . ? 
C81 C80 C91 111.3(7) . . ? 
C79 C80 C91 116.9(7) . . ? 
C64 C81 C80 121.9(9) . . ? 
C64 C81 C82 121.0(9) . . ? 
C80 C81 C82 104.9(7) . . ? 
C67 C82 C83 123.4(11) . . ? 
C67 C82 C81 118.0(10) . . ? 
C83 C82 C81 105.7(7) . . ? 
C84 C83 C91 120.7(8) . . ? 
C84 C83 C82 120.2(8) . . ? 
C91 C83 C82 107.4(7) . . ? 
C83 C84 C85 120.0(8) . . ? 
C83 C84 C69 118.3(8) . . ? 
C85 C84 C69 109.2(8) . . ? 
C86 C85 C84 121.5(9) . . ? 
C86 C85 C71 121.2(9) . . ? 
C84 C85 C71 105.7(9) . . ? 
C85 C86 C92 118.4(8) . . ? 
C85 C86 C87 119.0(9) . . ? 
C92 C86 C87 110.2(10) . . ? 
C73 C87 C88 119.6(9) . . ? 
C73 C87 C86 118.7(10) . . ? 
C88 C87 C86 109.3(9) . . ? 
C76 C88 C87 121.9(9) . . ? 
C76 C88 C89 118.9(11) . . ? 
C87 C88 C89 106.3(10) . . ? 
C90 C89 C92 115.3(11) . . ? 
C90 C89 C88 125.1(13) . . ? 
C92 C89 C88 108.7(10) . . ? 
C89 C90 C79 127.3(12) . . ? 
C89 C90 C78 113.9(11) . . ? 
C79 C90 C78 106.8(9) . . ? 
C92 C91 C83 118.2(7) . . ? 
C92 C91 C80 119.3(7) . . ? 
C83 C91 C80 110.7(7) . . ? 
C91 C92 C86 121.1(8) . . ? 
C91 C92 C89 121.2(8) . . ? 
C86 C92 C89 105.4(9) . . ? 
C61 C93 C106 121.0(9) . . ? 
C61 C93 C94 118.7(9) . . ? 
C106 C93 C94 108.2(8) . . ? 
C95 C94 C93 122.0(11) . . ? 
C95 C94 C107 120.4(12) . . ? 
C93 C94 C107 105.6(8) . . ? 
C94 C95 C63 119.2(12) . . ? 
C94 C95 C96 118.3(11) . . ? 
C63 C95 C96 110.4(10) . . ? 
C109 C96 C65 120.0(9) . . ? 
C109 C96 C95 122.6(9) . . ? 
C65 C96 C95 104.9(9) . . ? 
C110 C97 C66 121.0(10) . . ? 
C110 C97 C98 119.1(11) . . ? 
C66 C97 C98 107.3(11) . . ? 
C99 C98 C68 119.8(9) . . ? 
C99 C98 C97 118.6(11) . . ? 
C68 C98 C97 109.7(11) . . ? 
C98 C99 C100 122.3(9) . . ? 
C98 C99 C112 121.9(10) . . ? 
C100 C99 C112 103.7(8) . . ? 
C70 C100 C99 118.5(9) . . ? 
C70 C100 C101 119.6(10) . . ? 
C99 C100 C101 109.9(8) . . ? 
C113 C101 C100 111.8(9) . . ? 
C113 C101 C102 118.4(9) . . ? 
C100 C101 C102 118.3(9) . . ? 
C103 C102 C101 119.5(9) . . ? 
C103 C102 C72 107.6(11) . . ? 
C101 C102 C72 120.4(10) . . ? 
C115 C103 C102 119.8(10) . . ? 
C115 C103 C74 119.7(12) . . ? 
C102 C103 C74 108.3(10) . . ? 
C116 C104 C105 121.5(13) . . ? 
C116 C104 C75 117.7(14) . . ? 
C105 C104 C75 109.2(12) . . ? 
C106 C105 C104 119.9(10) . . ? 
C106 C105 C77 119.1(10) . . ? 
C104 C105 C77 108.4(11) . . ? 
C93 C106 C105 118.7(8) . . ? 
C93 C106 C118 110.6(8) . . ? 
C105 C106 C118 118.5(9) . . ? 
C108 C107 C118 121.6(9) . . ? 
C108 C107 C94 119.6(9) . . ? 
C118 C107 C94 107.4(8) . . ? 
C107 C108 C119 118.2(9) . . ? 
C107 C108 C109 119.3(9) . . ? 
C119 C108 C109 110.6(9) . . ? 
C96 C109 C110 119.9(8) . . ? 
C96 C109 C108 119.8(10) . . ? 
C110 C109 C108 108.3(9) . . ? 
C97 C110 C109 119.7(9) . . ? 
C97 C110 C111 122.3(10) . . ? 
C109 C110 C111 106.2(9) . . ? 
C112 C111 C119 119.1(12) . . ? 
C112 C111 C110 120.8(12) . . ? 
C119 C111 C110 108.8(10) . . ? 
C111 C112 C113 124.0(12) . . ? 
C111 C112 C99 117.3(11) . . ? 
C113 C112 C99 107.2(9) . . ? 
C114 C113 C101 120.5(9) . . ? 
C114 C113 C112 119.1(8) . . ? 
C101 C113 C112 107.3(8) . . ? 
C113 C114 C115 118.6(8) . . ? 
C113 C114 C120 118.9(8) . . ? 
C115 C114 C120 111.9(8) . . ? 
C103 C115 C114 123.1(10) . . ? 
C103 C115 C116 117.9(9) . . ? 
C114 C115 C116 106.0(8) . . ? 
C104 C116 C117 122.0(12) . . ? 
C104 C116 C115 122.2(12) . . ? 
C117 C116 C115 103.7(8) . . ? 
C118 C117 C120 120.0(8) . . ? 
C118 C117 C116 119.0(8) . . ? 
C120 C117 C116 107.8(8) . . ? 
C117 C118 C107 120.5(8) . . ? 
C117 C118 C106 119.1(9) . . ? 
C107 C118 C106 108.1(8) . . ? 
C120 C119 C108 120.9(8) . . ? 
C120 C119 C111 120.3(9) . . ? 
C108 C119 C111 106.1(9) . . ? 
C119 C120 C114 118.6(7) . . ? 
C119 C120 C117 118.9(7) . . ? 
C114 C120 C117 110.6(8) . . ? 
C121 C122 C137 111.7(4) . . ? 
C121 C122 C123 112.2(4) . . ? 
C137 C122 C123 106.4(4) . . ? 
C121 C122 C151 112.2(4) . . ? 
C137 C122 C151 106.9(4) . . ? 
C123 C122 C151 107.0(4) . . ? 
C125 C123 C164 112.9(4) . . ? 
C125 C123 C124 108.7(4) . . ? 
C164 C123 C124 111.2(5) . . ? 
C125 C123 C122 104.2(4) . . ? 
C164 C123 C122 103.7(4) . . ? 
C124 C123 C122 116.0(4) . . ? 
C126 C125 C136 120.0(5) . . ? 
C126 C125 C123 127.2(5) . . ? 
C136 C125 C123 112.7(5) . . ? 
C127 C126 C125 120.6(5) . . ? 
C126 C127 C134 119.7(5) . . ? 
C126 C127 S1 119.1(4) . . ? 
C134 C127 S1 121.0(4) . . ? 
C129 C128 C133 119.9(5) . . ? 
C129 C128 S1 119.7(5) . . ? 
C133 C128 S1 120.4(4) . . ? 
C128 C129 C130 119.7(6) . . ? 
C131 C130 C129 121.0(5) . . ? 
C130 C131 C132 119.5(5) . . ? 
C133 C132 C131 119.9(5) . . ? 
C132 C133 C128 119.9(5) . . ? 
C132 C133 S2 117.6(4) . . ? 
C128 C133 S2 122.4(4) . . ? 
C135 C134 C127 119.5(5) . . ? 
C135 C134 S2 118.9(4) . . ? 
C127 C134 S2 121.3(4) . . ? 
C136 C135 C134 120.0(5) . . ? 
C135 C136 C125 119.9(5) . . ? 
C135 C136 C137 127.6(5) . . ? 
C125 C136 C137 112.4(5) . . ? 
C136 C137 C139 112.3(4) . . ? 
C136 C137 C138 111.4(5) . . ? 
C139 C137 C138 108.5(4) . . ? 
C136 C137 C122 104.1(4) . . ? 
C139 C137 C122 103.7(4) . . ? 
C138 C137 C122 116.6(4) . . ? 
C140 C139 C150 121.3(5) . . ? 
C140 C139 C137 126.4(5) . . ? 
C150 C139 C137 112.2(5) . . ? 
C139 C140 C141 120.4(5) . . ? 
C148 C141 C140 118.2(5) . . ? 
C148 C141 S3 123.8(4) . . ? 
C140 C141 S3 117.9(4) . . ? 
C147 C142 C143 120.7(6) . . ? 
C147 C142 S3 121.9(5) . . ? 
C143 C142 S3 117.3(5) . . ? 
C144 C143 C142 119.6(6) . . ? 
C143 C144 C145 119.4(6) . . ? 
C146 C145 C144 121.4(6) . . ? 
C145 C146 C147 119.2(6) . . ? 
C142 C147 C146 119.7(6) . . ? 
C142 C147 S4 123.5(5) . . ? 
C146 C147 S4 116.6(5) . . ? 
C149 C148 C141 121.0(5) . . ? 
C149 C148 S4 118.0(4) . . ? 
C141 C148 S4 120.9(4) . . ? 
C148 C149 C150 120.0(5) . . ? 
C139 C150 C149 119.0(5) . . ? 
C139 C150 C151 113.6(5) . . ? 
C149 C150 C151 127.3(5) . . ? 
C150 C151 C153 112.2(4) . . ? 
C150 C151 C152 110.8(5) . . ? 
C153 C151 C152 110.5(4) . . ? 
C150 C151 C122 103.5(4) . . ? 
C153 C151 C122 103.4(4) . . ? 
C152 C151 C122 116.2(4) . . ? 
C154 C153 C164 119.9(5) . . ? 
C154 C153 C151 127.2(5) . . ? 
C164 C153 C151 112.9(5) . . ? 
C153 C154 C155 120.3(5) . . ? 
C154 C155 C162 119.9(5) . . ? 
C154 C155 S5 119.4(4) . . ? 
C162 C155 S5 120.6(4) . . ? 
C157 C156 C161 120.9(5) . . ? 
C157 C156 S5 118.9(4) . . ? 
C161 C156 S5 120.0(4) . . ? 
C158 C157 C156 119.7(6) . . ? 
C157 C158 C159 120.3(6) . . ? 
C160 C159 C158 119.5(6) . . ? 
C159 C160 C161 120.4(6) . . ? 
C156 C161 C160 119.1(5) . . ? 
C156 C161 S6 121.9(4) . . ? 
C160 C161 S6 118.9(4) . . ? 
C163 C162 C155 119.9(5) . . ? 
C163 C162 S6 118.7(4) . . ? 
C155 C162 S6 121.3(4) . . ? 
C162 C163 C164 119.8(5) . . ? 
C153 C164 C163 120.1(5) . . ? 
C153 C164 C123 113.0(5) . . ? 
C163 C164 C123 126.8(5) . . ? 
C170 C165 C166 121.8(6) . . ? 
C170 C165 Cl1 118.9(5) . . ? 
C166 C165 Cl1 119.3(5) . . ? 
C167 C166 C165 118.9(6) . . ? 
C168 C167 C166 120.5(7) . . ? 
C167 C168 C169 119.6(7) . . ? 
C170 C169 C168 120.9(7) . . ? 
C165 C170 C169 118.2(6) . . ? 
C176 C171 C172 118.0(10) . . ? 
C176 C171 Cl2 121.8(10) . . ? 
C172 C171 Cl2 120.1(10) . . ? 
C171 C172 C173 112.2(11) . . ? 
C172 C173 C174 142.6(13) . . ? 
C173 C174 C175 91.2(9) . . ? 
C176 C175 C174 136.8(11) . . ? 
C175 C176 C171 119.0(10) . . ? 
C179 C177 C180 179.2(14) . 3_656 ? 
C179 C177 C178 128.1(12) . 3_656 ? 
C180 C177 C178 52.7(10) 3_656 3_656 ? 
C179 C177 C178 65.7(10) . . ? 
C180 C177 C178 115.1(12) 3_656 . ? 
C178 C177 C178 62.4(10) 3_656 . ? 
C180 C178 C177 61.5(13) . 3_656 ? 
C180 C178 C178 124(2) . 3_656 ? 
C177 C178 C178 62.6(11) 3_656 3_656 ? 
C180 C178 C177 178.0(15) . . ? 
C177 C178 C177 117.6(10) 3_656 . ? 
C178 C178 C177 54.9(10) 3_656 . ? 
C180 C178 C179 129.9(17) . . ? 
C177 C178 C179 168.4(14) 3_656 . ? 
C178 C178 C179 105.9(17) 3_656 . ? 
C177 C178 C179 51.0(9) . . ? 
C180 C178 Cl3 60.6(12) . . ? 
C177 C178 Cl3 122.0(12) 3_656 . ? 
C178 C178 Cl3 174.6(18) 3_656 . ? 
C177 C178 Cl3 120.3(11) . . ? 
C179 C178 Cl3 69.4(9) . . ? 
C177 C179 C178 63.3(8) . . ? 
C177 C179 Cl3 122.2(11) . . ? 
C178 C179 Cl3 58.9(8) . . ? 
C178 C180 C177 65.8(12) . 3_656 ? 
C178 C180 Cl3 75.1(13) . . ? 
C177 C180 Cl3 140.9(15) 3_656 . ? 
 
_diffrn_measured_fraction_theta_max    0.995 
_diffrn_reflns_theta_full              26.50 
_diffrn_measured_fraction_theta_full   0.995 
_refine_diff_density_max    1.063 
_refine_diff_density_min   -0.956 
_refine_diff_density_rms    0.087 
